# Supplementary material for: Ventilation Liberation Practices Among 380 International PICUs
Source: PubMed Central journal article supplement — Crit Care Explor. 2022 May 27;4(6):e0710. doi: 10.1097/CCE.0000000000000710 (PMC9150886; doi:10.1097/cce.0000000000000710), 2022-05-27
Supplement: cc9-4-e0710-s001.pdf [file cc9-4-e0710-s001.pdf]

**Supplemental Table 1:** Core questions for extubation practice survey development

- #1:** How is de-escalation of ventilation support and liberation most commonly performed?
- #2:** Is routine protocolized screening for ERT/SBTs readiness performed?
- #3:** Is a protocolized SBT process used?
- #4:** For patients who undergo an SBT, how is the timing of initiation determined?
- #5:** In those who are undergoing an SBT as part of extubation readiness assessments, should pressure support be used?
- #6:** In patients who are undergoing an SBT to assess for extubation readiness, is the SBT conducted for > 30 minutes?
- #7:** In patients who are undergoing an SBT to assess for extubation readiness, what pass/fail criteria should be considered?
- #8:** Is endotracheal secretion burden a part of the extubation readiness assessment?
- #9:** Is an objective measure of respiratory muscle strength during airway occlusion (i.e. NIF or PiMax) included in determining extubation readiness?
- #10:** Is an endotracheal tube air leak test to predict post-extubation obstruction measured prior to extubation?
- #11:** Are systemic steroids administered prior to extubation to prevent post-extubation upper airway obstruction?
- #12:** Is planned non-invasive respiratory support (BiPAP/CPAP, HFNC) used after extubation?
- #13:** Is a standardized measure of pain and sedation included in determining extubation readiness?
- #14:** Is a measure of fluid balance be included in determining extubation readiness?
- #15:** Does time of day (day shift vs. night shift) influence the decision to extubate?

LEGEND: Bi-Level Positive Airway Pressure (BiPAP), Continuous Positive Airway Pressure (CPAP), Extubation Readiness Test (ERT), High Flow Nasal Cannula (HFNC), Negative Inspiratory Force (NIF), Maximum Inspiratory Pressure (PiMax), Spontaneous Breathing Trial (SBT)

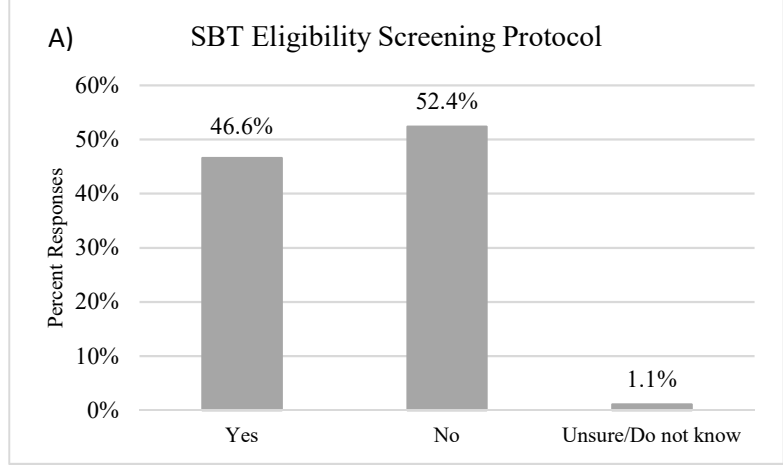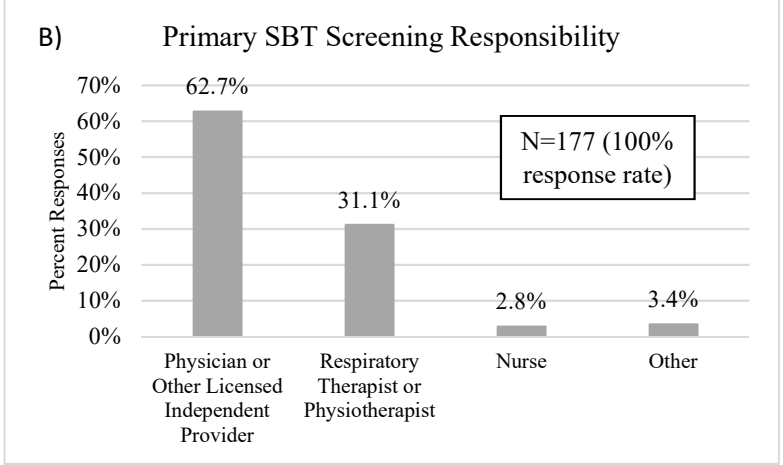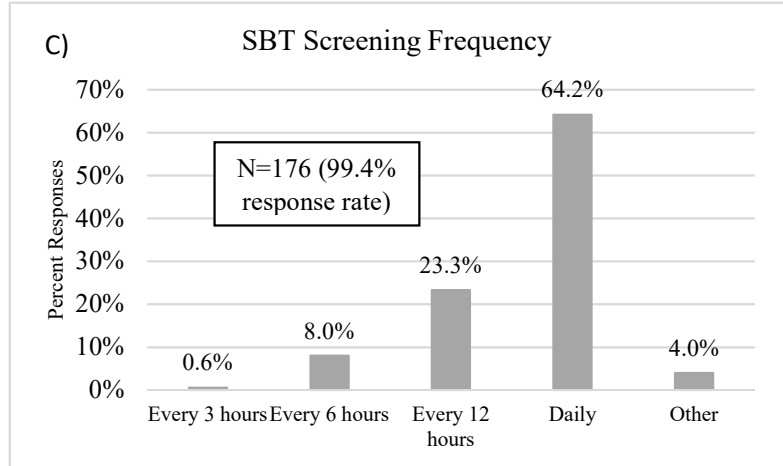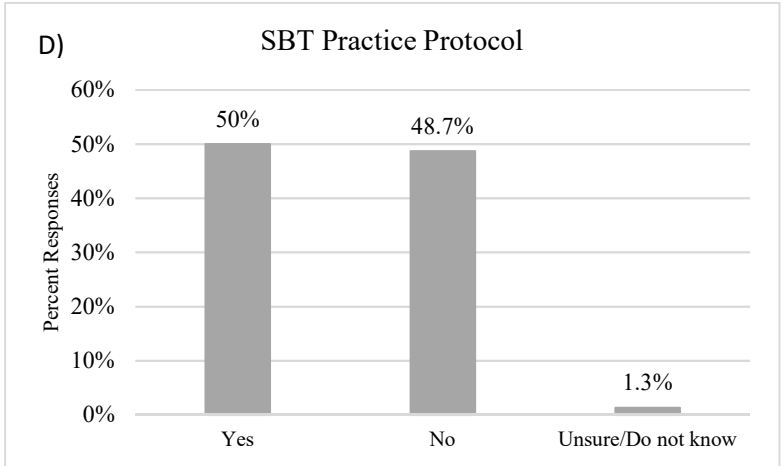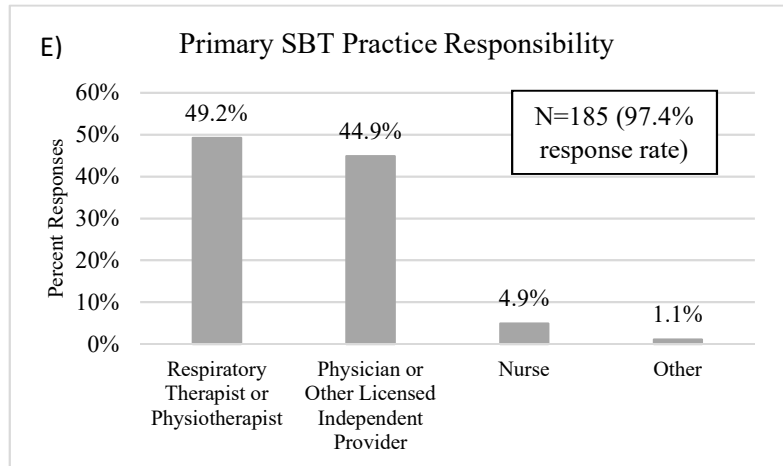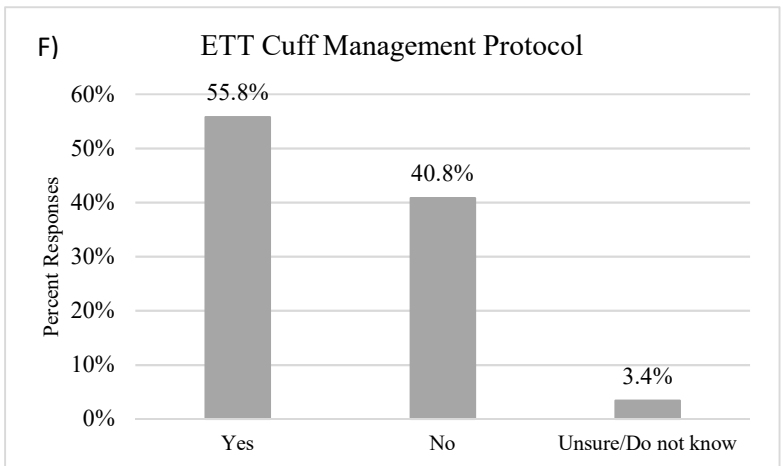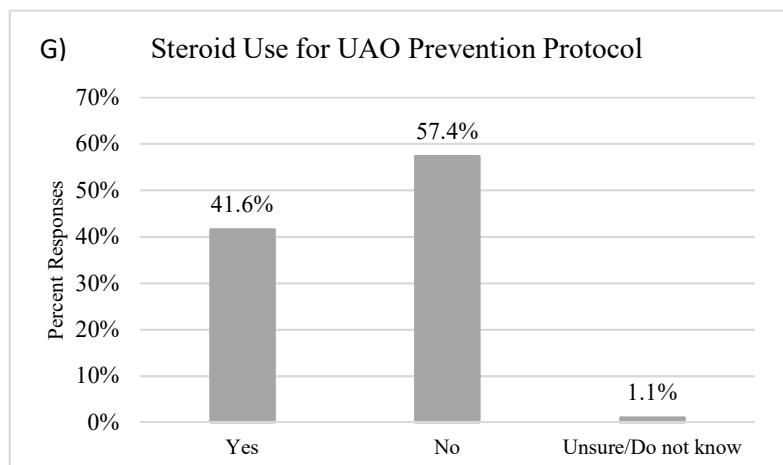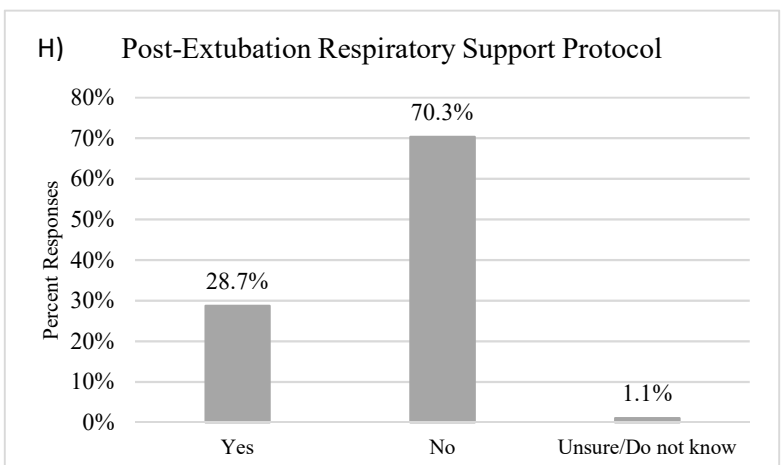

**Supplemental Figure 1:** Ventilation liberation protocols and practice patterns; Response denominator N=380 with 100% response rate unless otherwise noted; For SBT protocols (screening and practice), only “yes” responses allowed detail questions about protocols to populate in the survey; Endotracheal Tube (ETT), Spontaneous Breathing Trial (SBT), Upper Airway Obstruction (UAO)
